# Supplementary material for: Silver-catalyzed amidation of benzoylformic acids with tertiary amines via selective carbon–nitrogen bond cleavage
Source: Royal Society of Chemistry journal article supplement (doi:10.1039/c3ob40619a), 2013-01-01

***Supporting information :***

**Silver-catalyzed amidation of benzoylformic acids with  
tertiary amines via selective carbon–nitrogen bond cleavage**

Xiaobin Zhang,<sup>a</sup> Wenchao Yang,<sup>a</sup> and Lei Wang\*<sup>a,b</sup>

<sup>a</sup> Department of Chemistry, Huaibei Normal University, Huaibei, Anhui 235000, P R  
China

Tel: + 86-561-3802-069 Fax: + 86-561-3090-518 E-mail: leiwang@chnu.edu.cn

<sup>b</sup> State Key Laboratory of Organometallic Chemistry, Shanghai Institute of Organic  
Chemistry, Chinese Academy of Sciences, Shanghai 200032, P R China

***Table of Contents for Supporting Information***

<sup>1</sup>H and <sup>13</sup>C NMR spectra of the products.....11

## $^1\text{H}$ and $^{13}\text{C}$ NMR spectra of the products

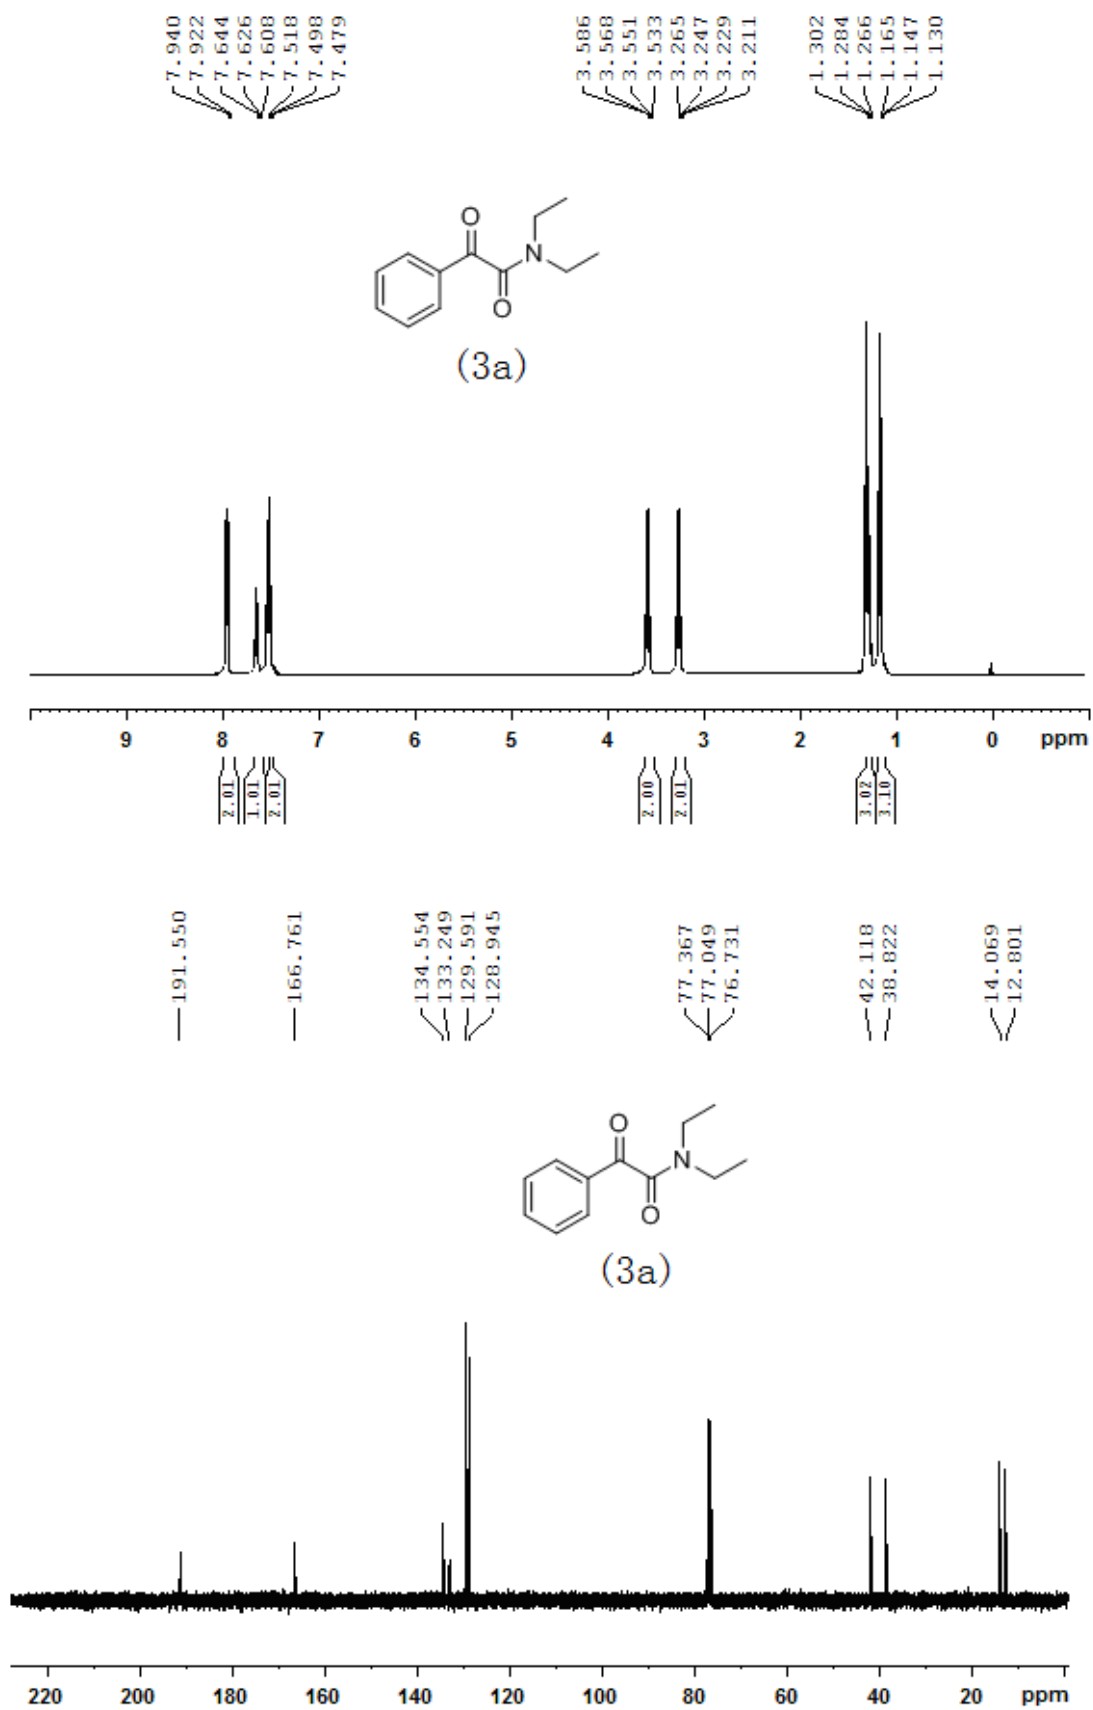

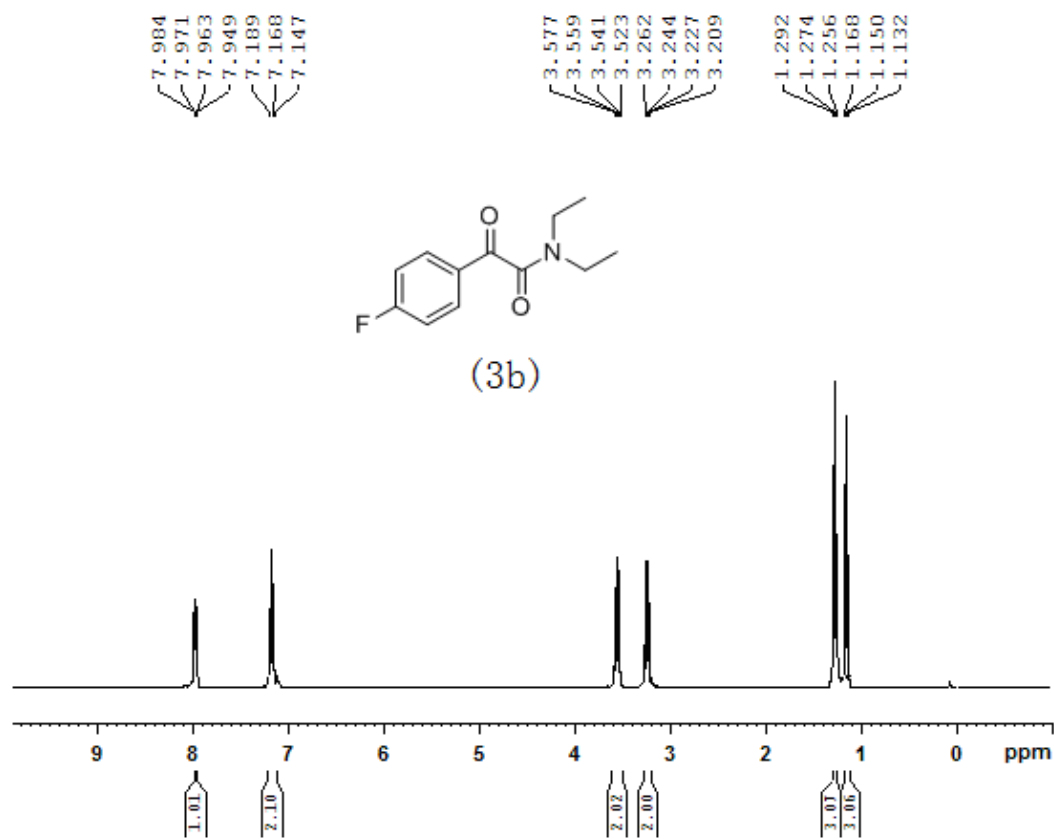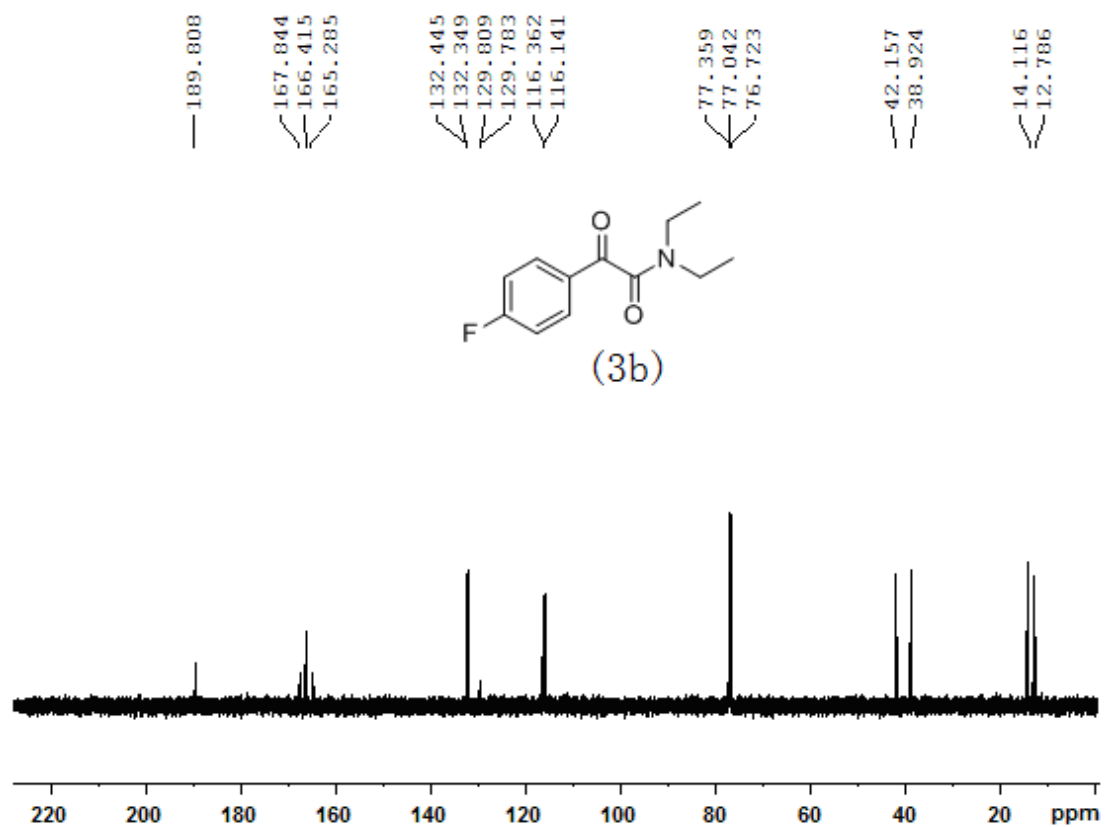

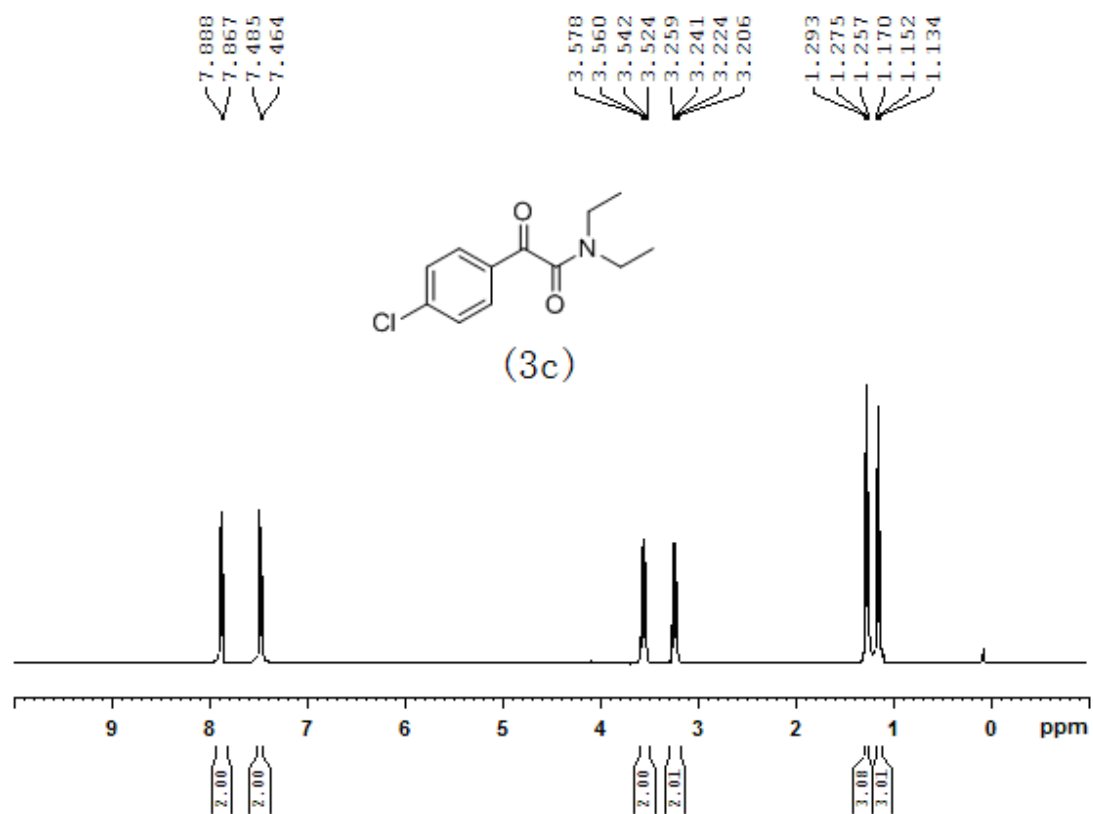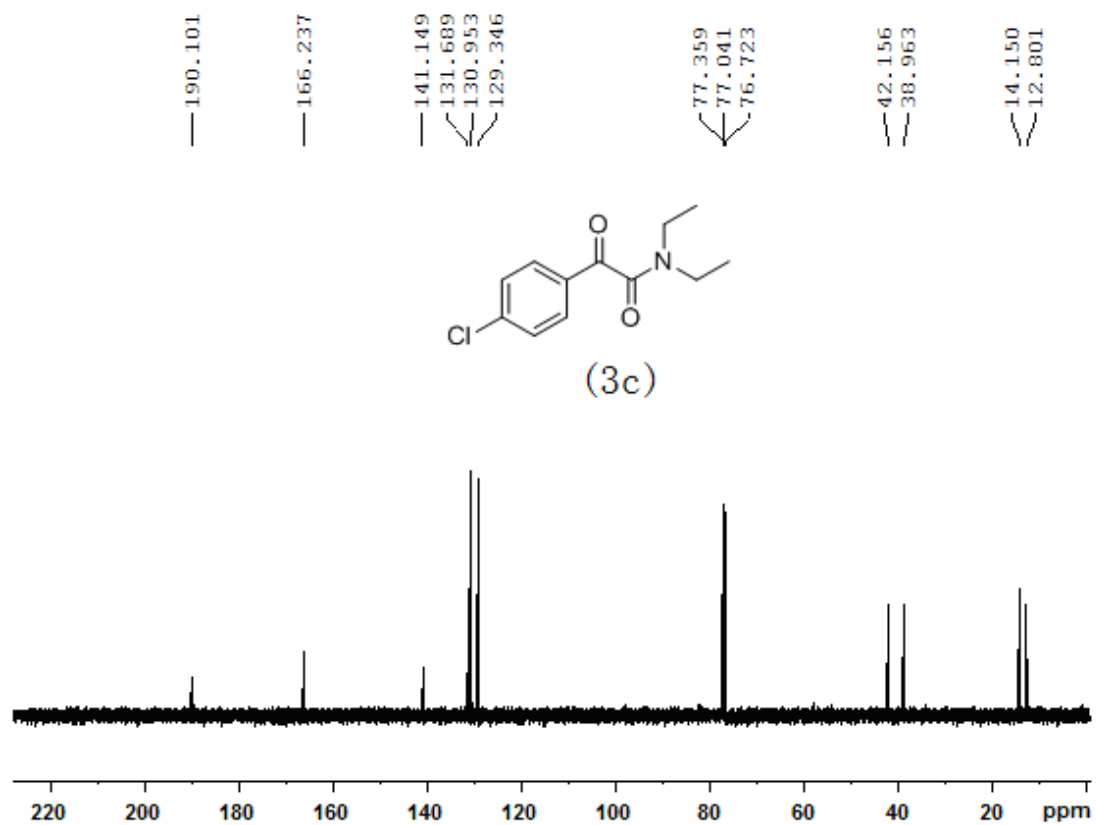

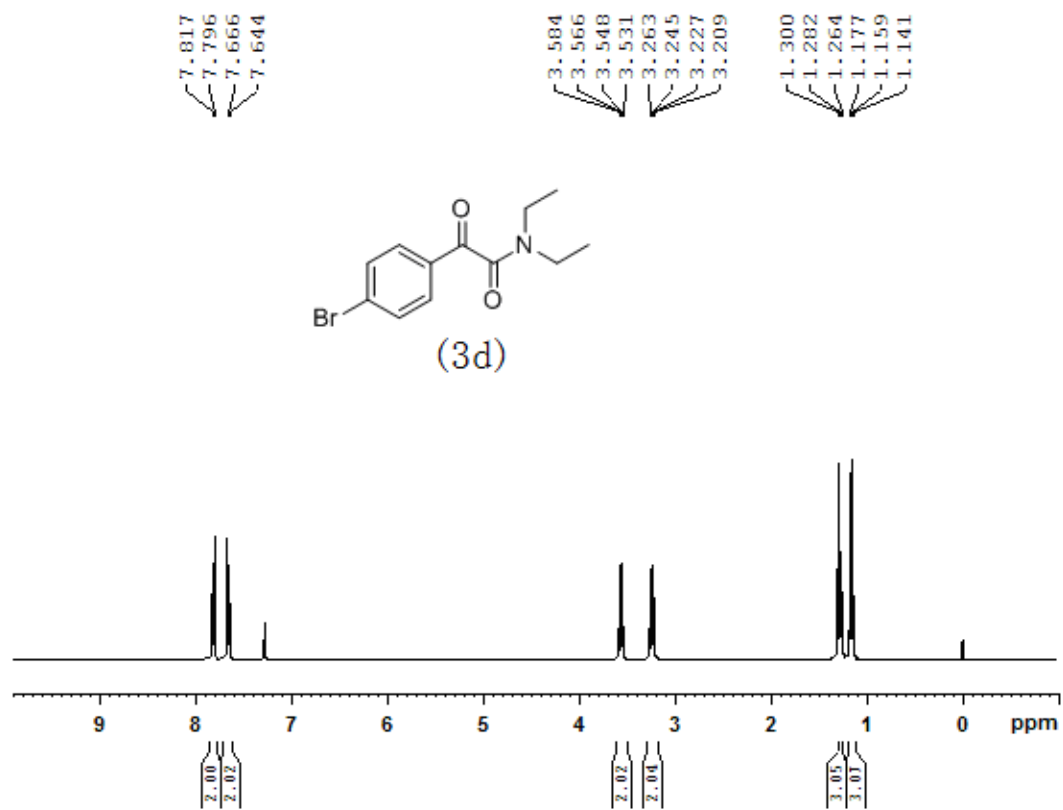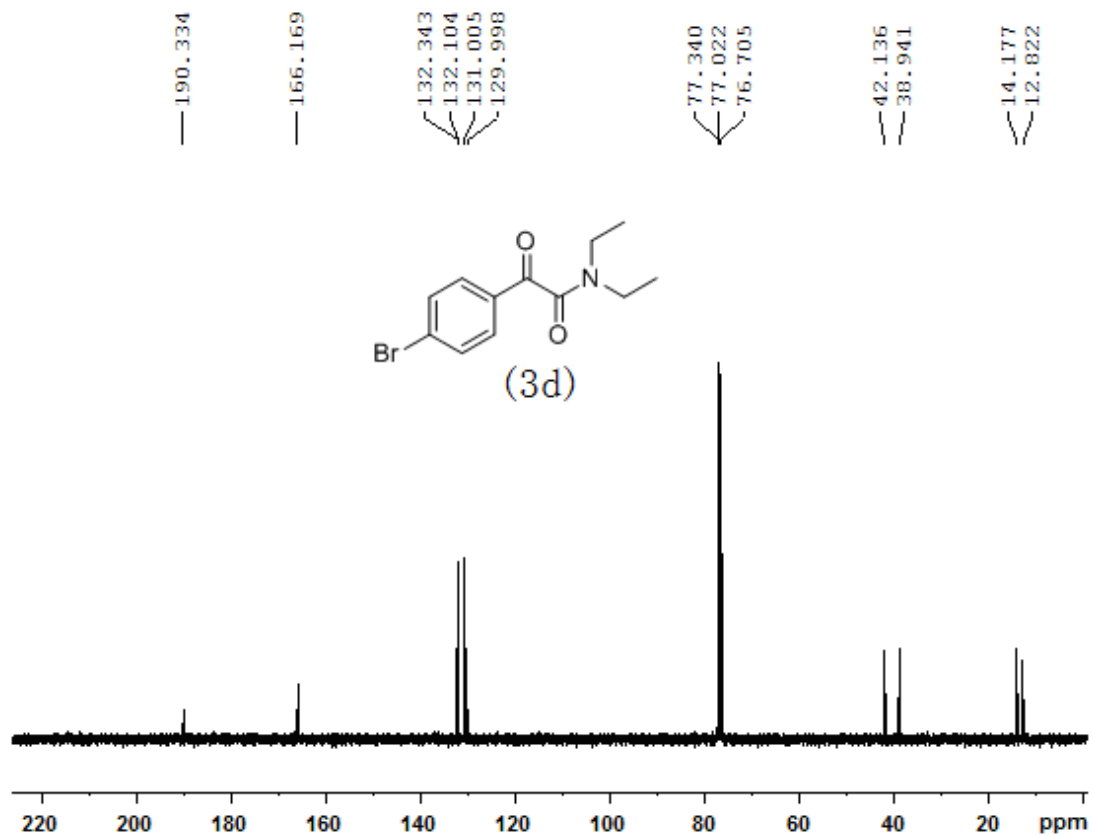

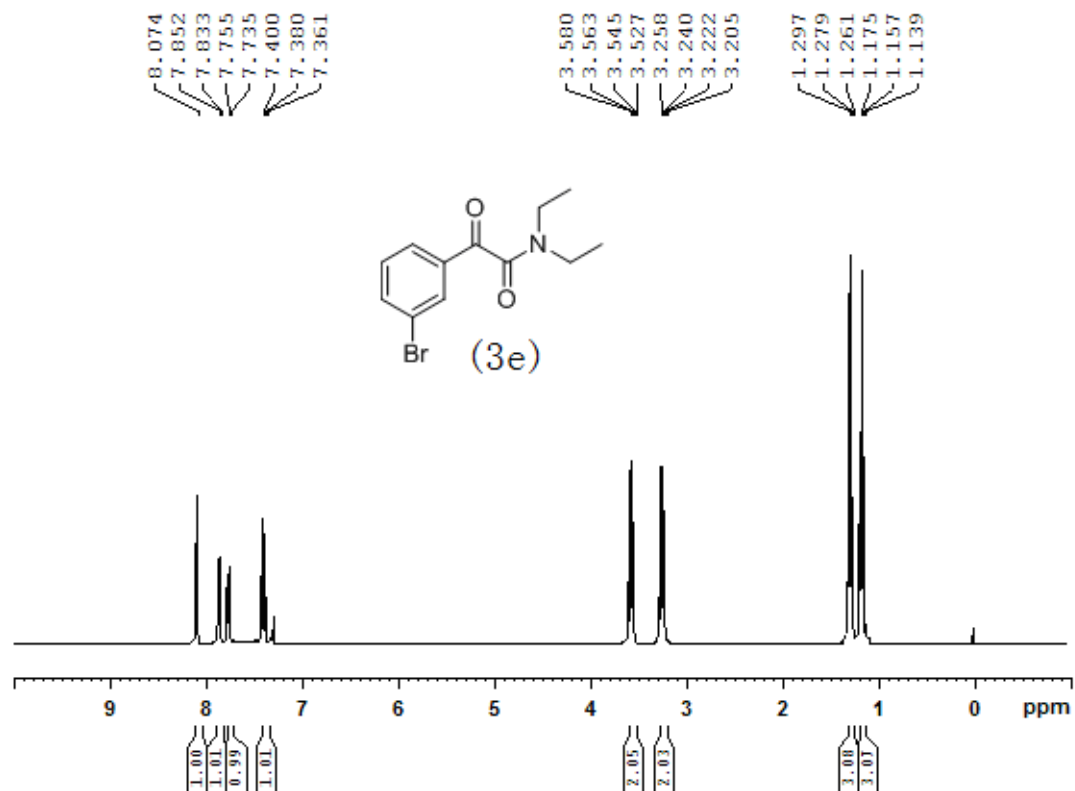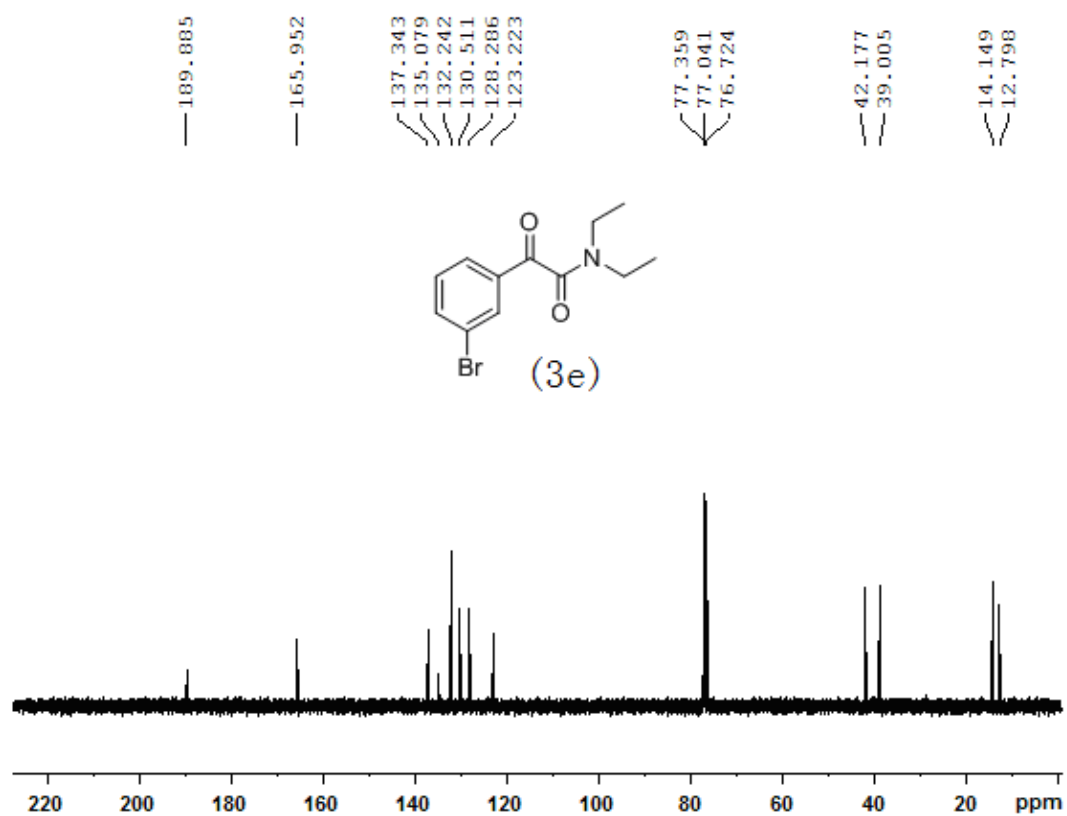

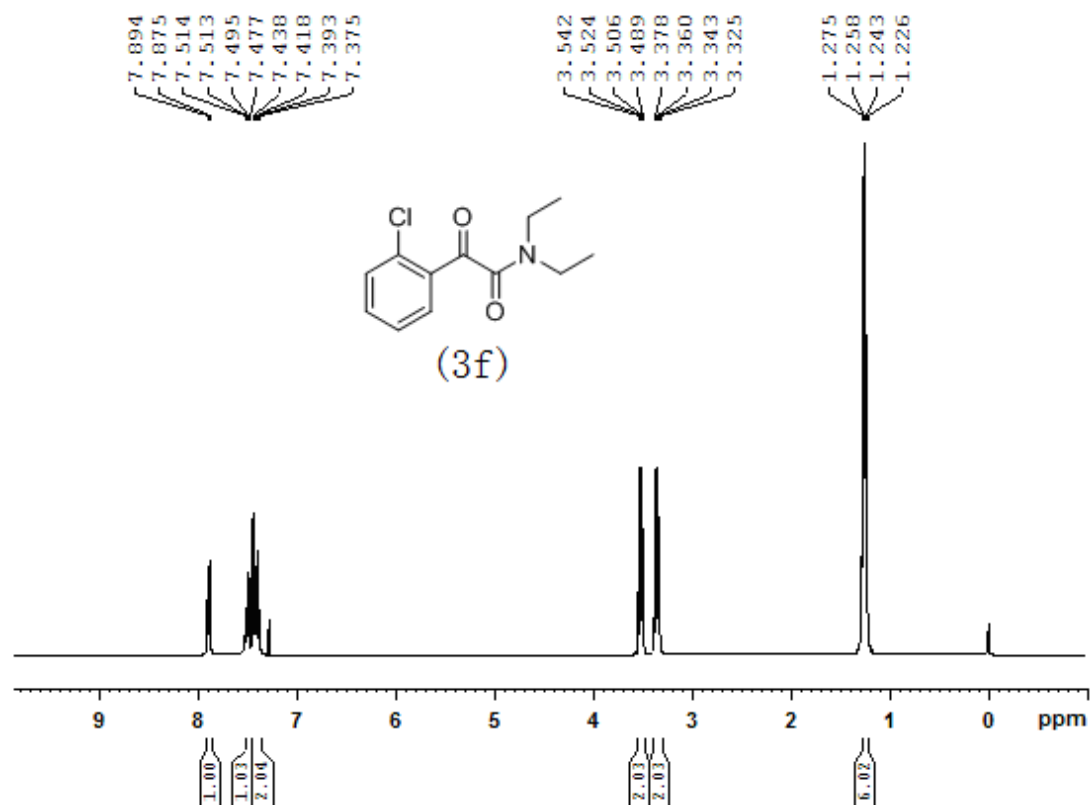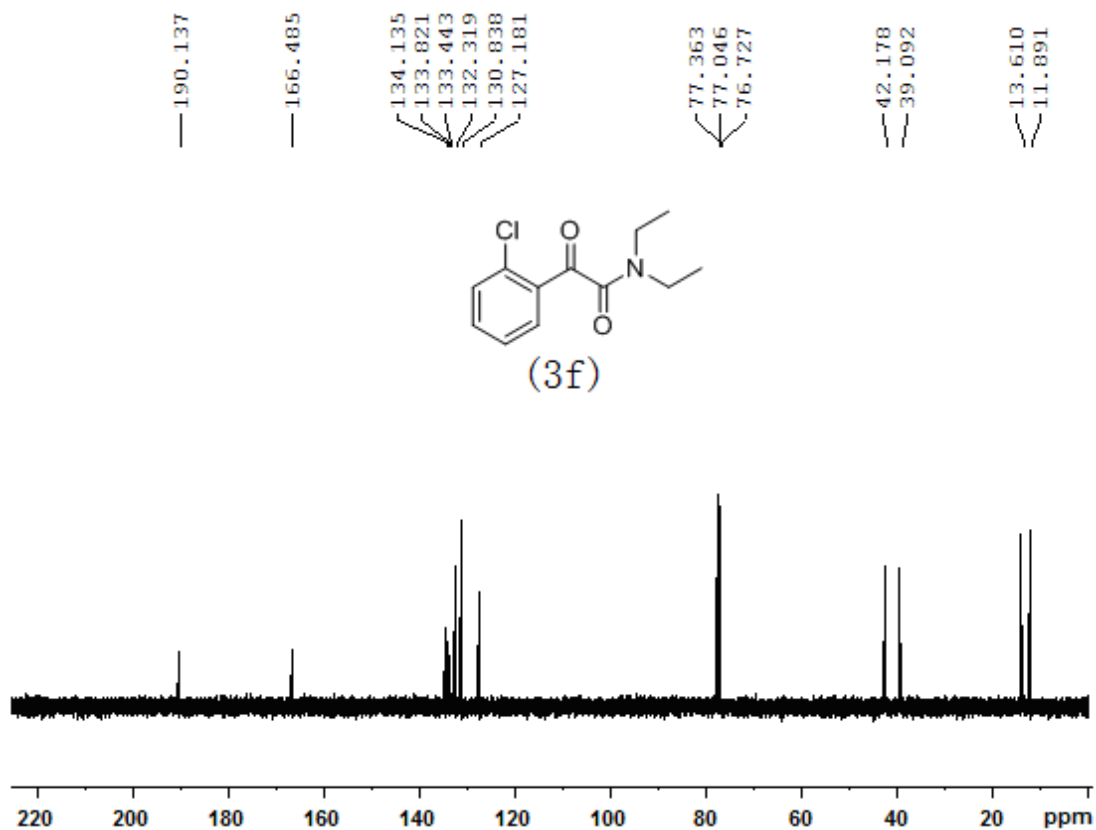

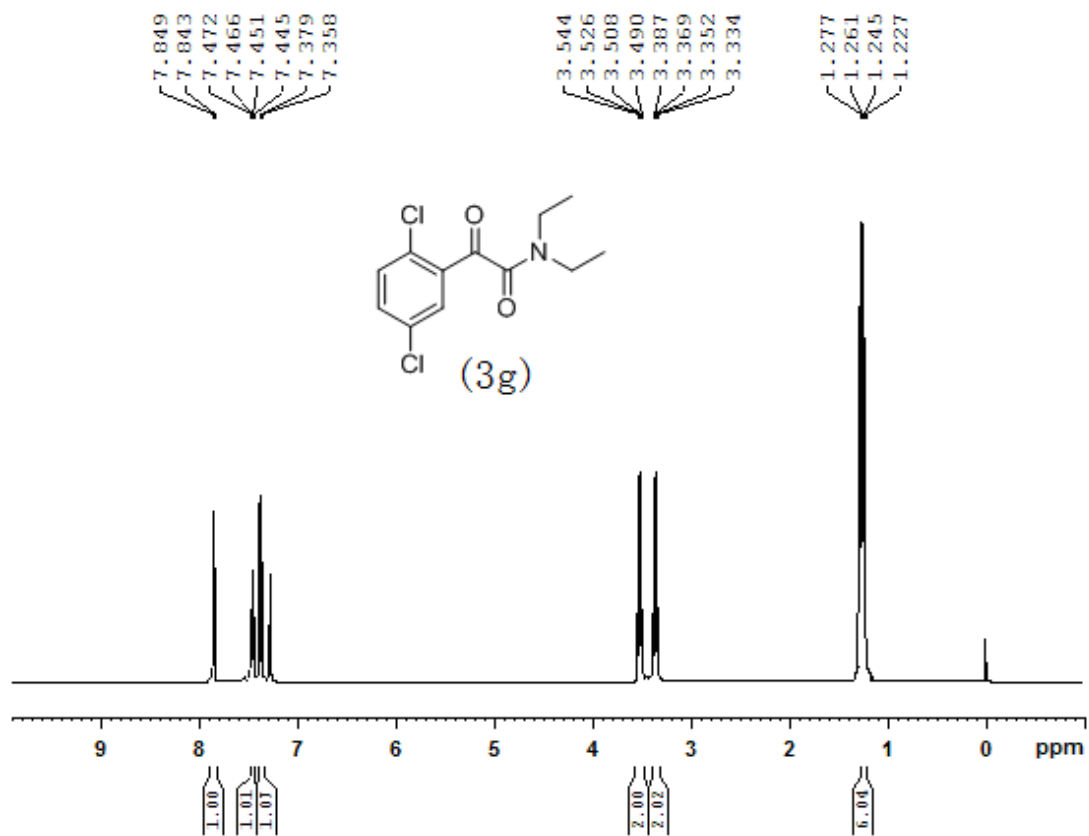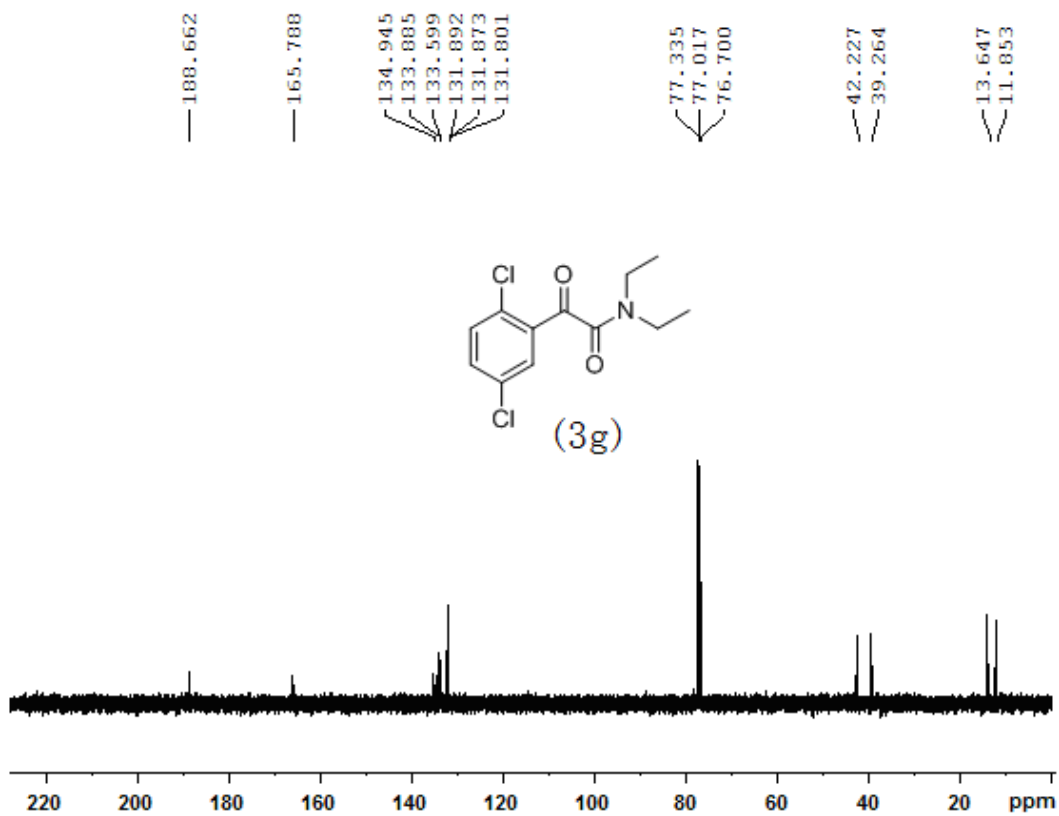



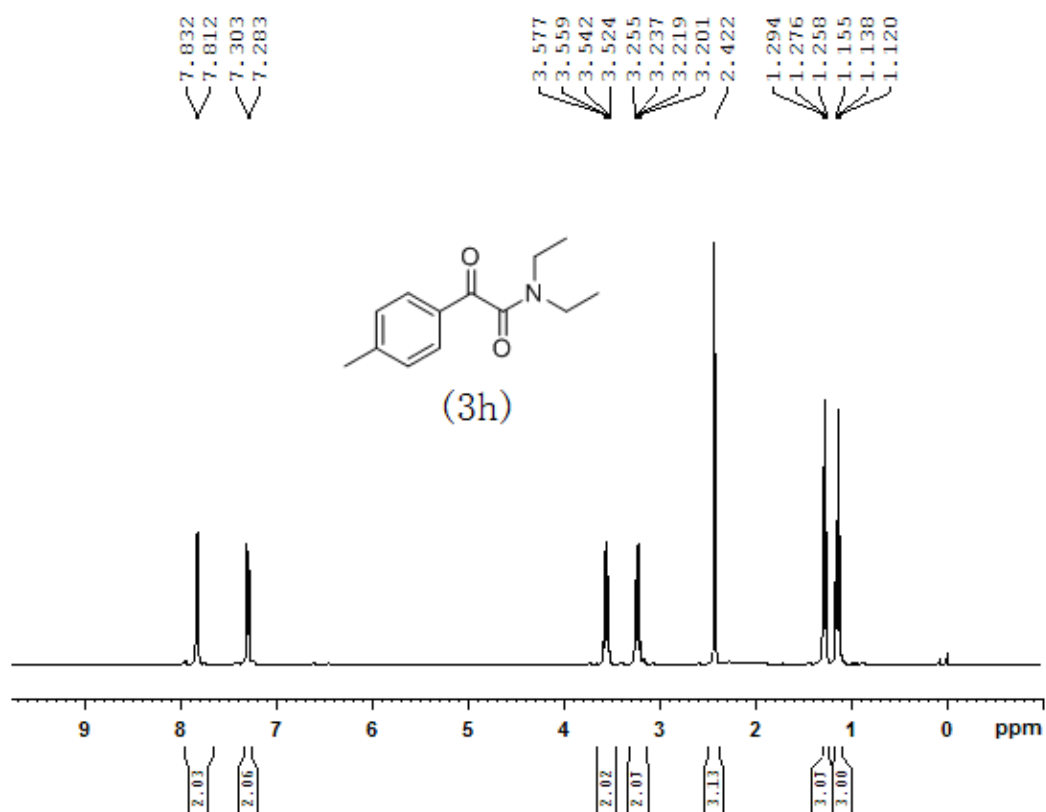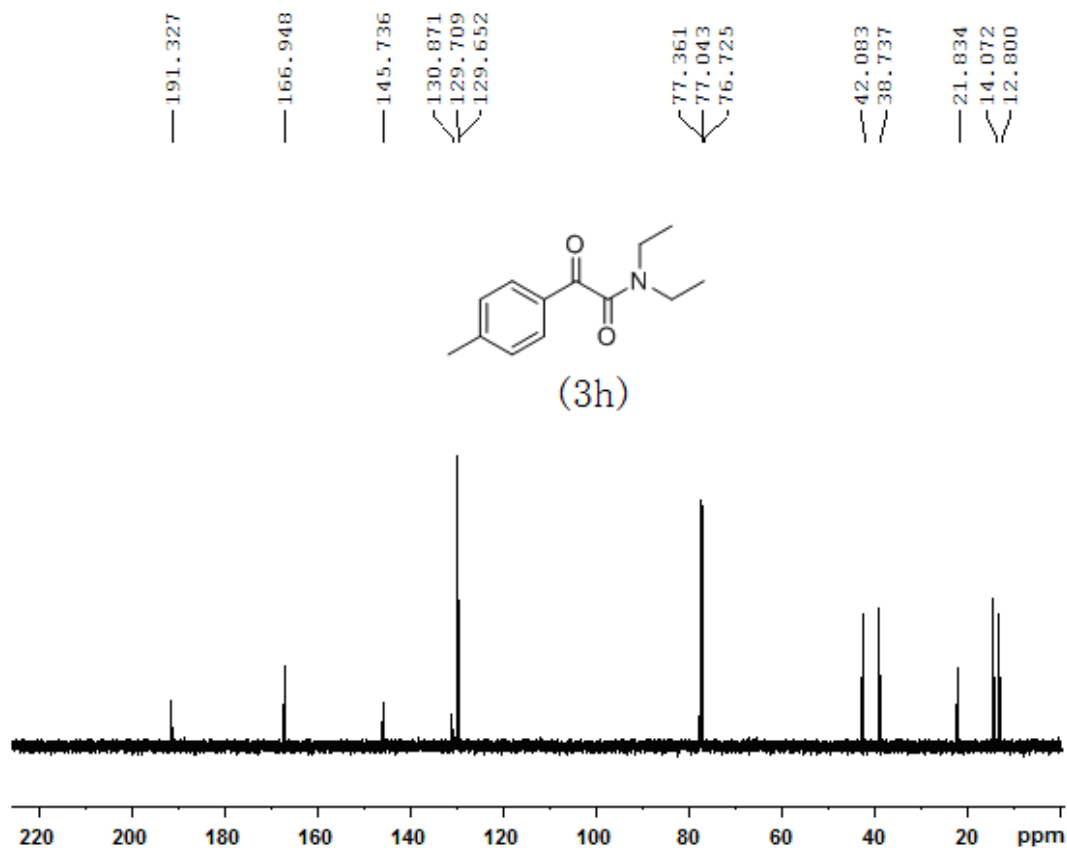

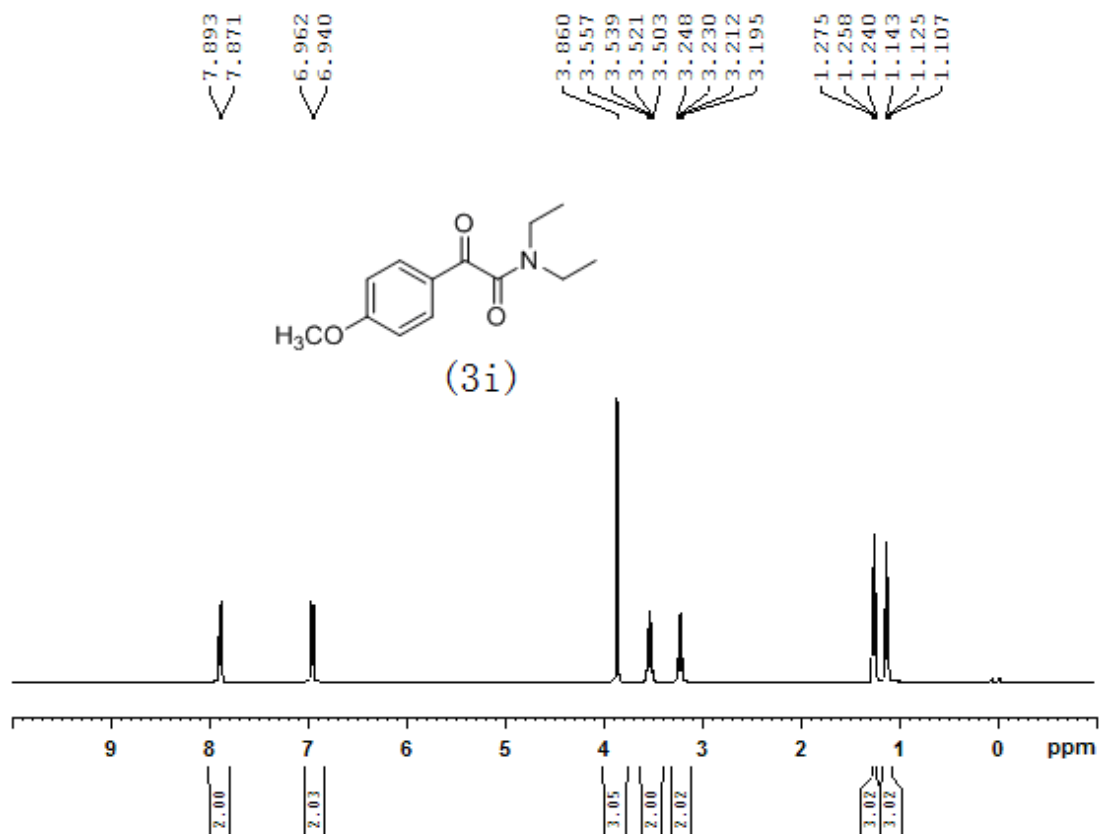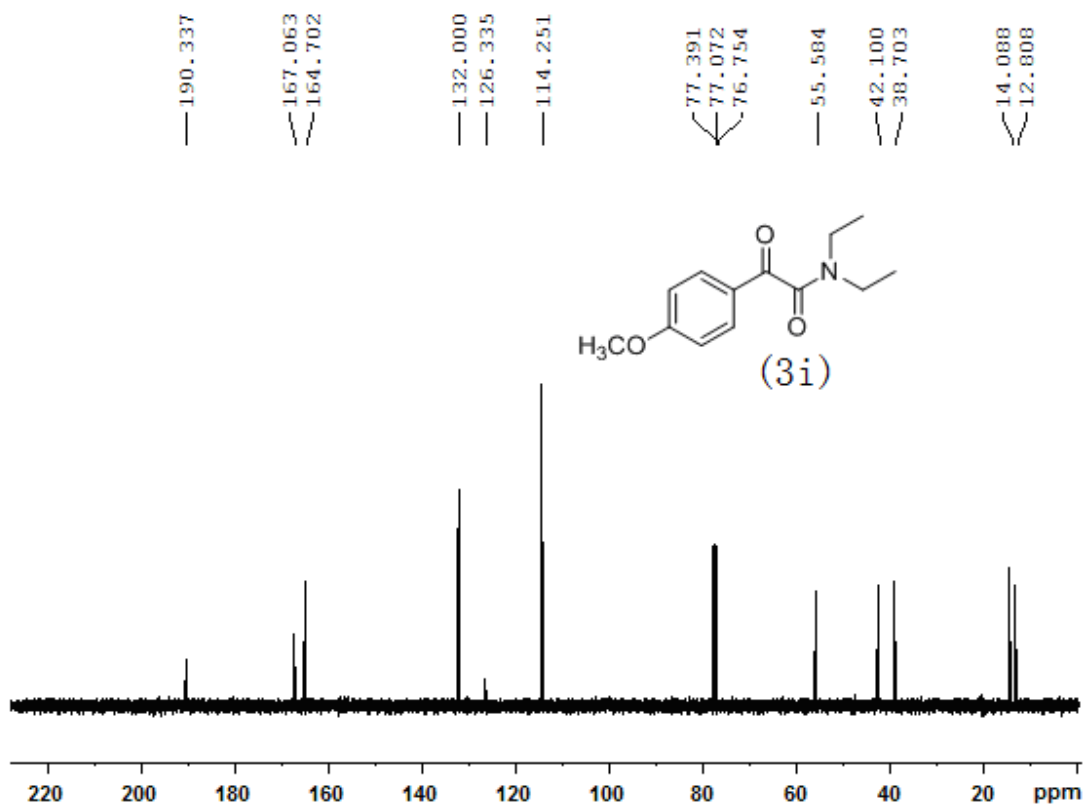

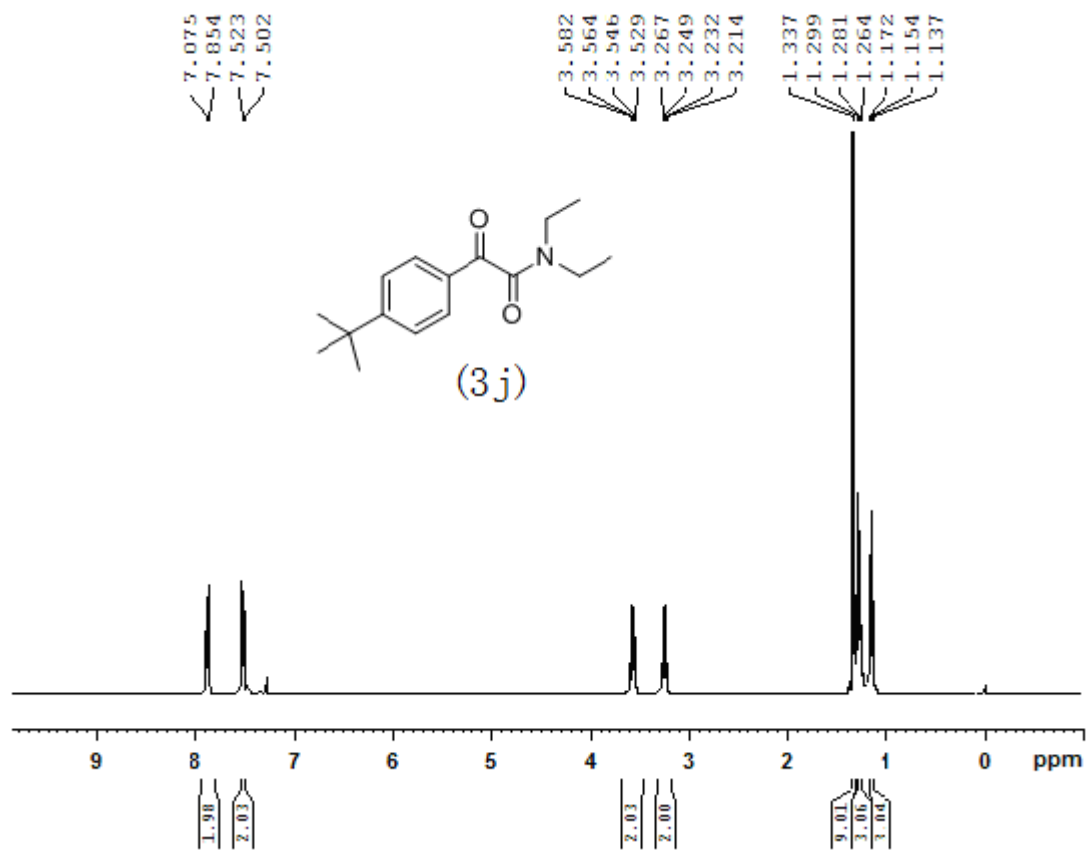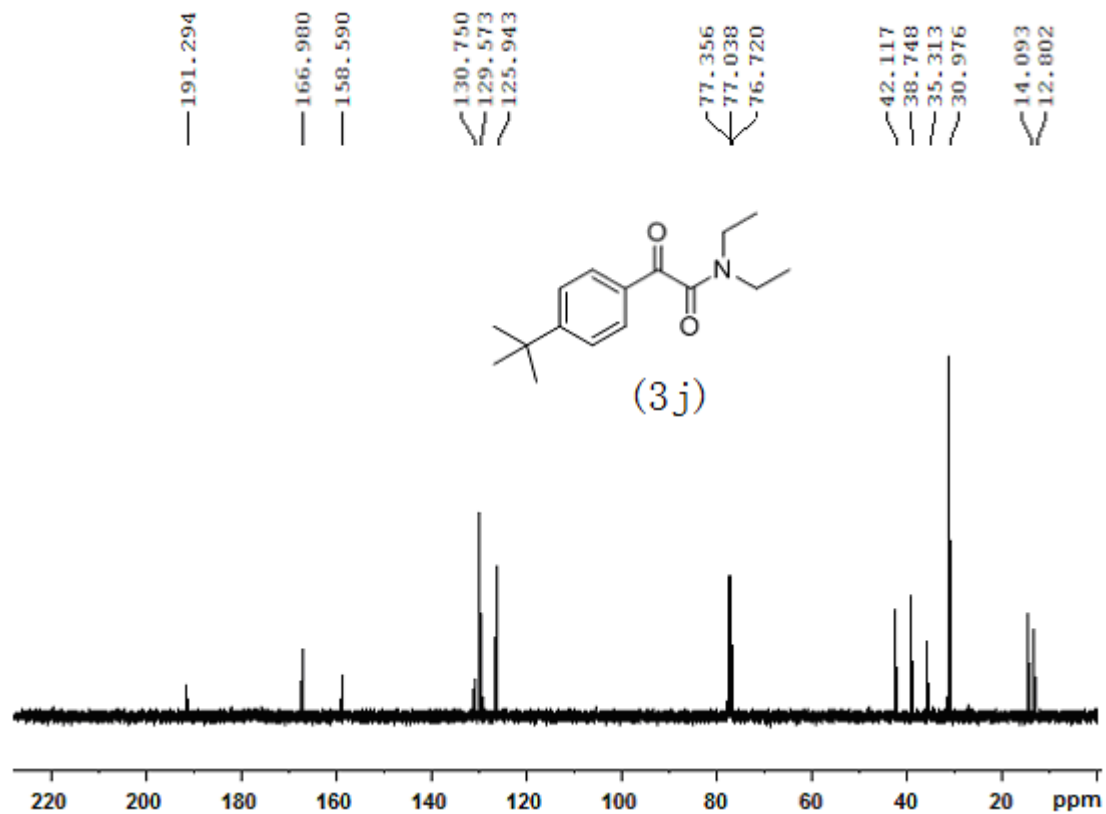

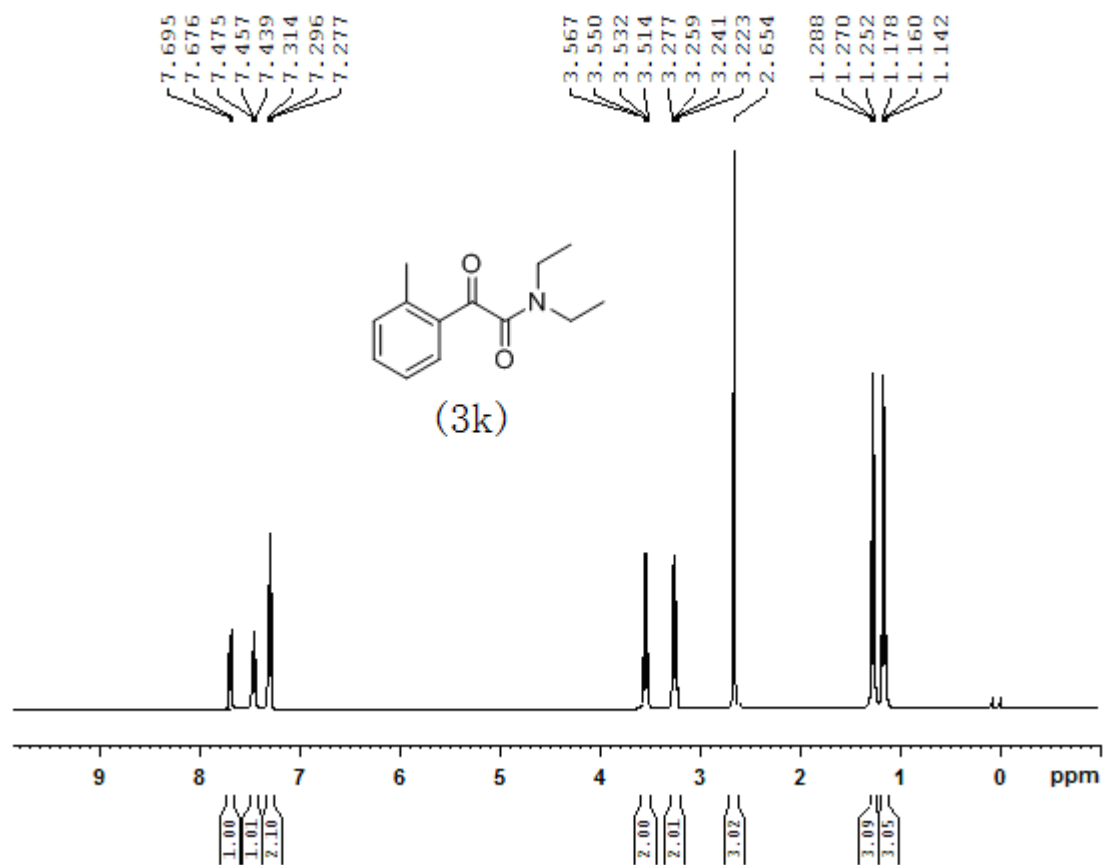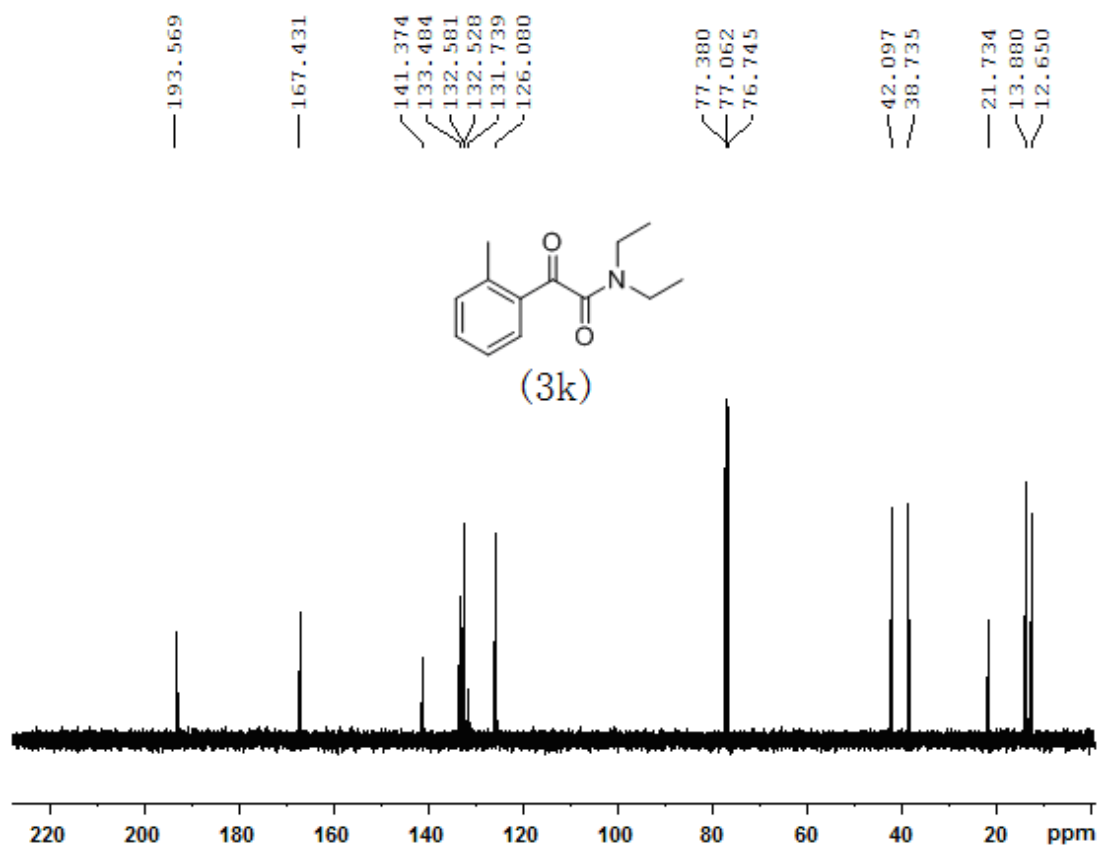

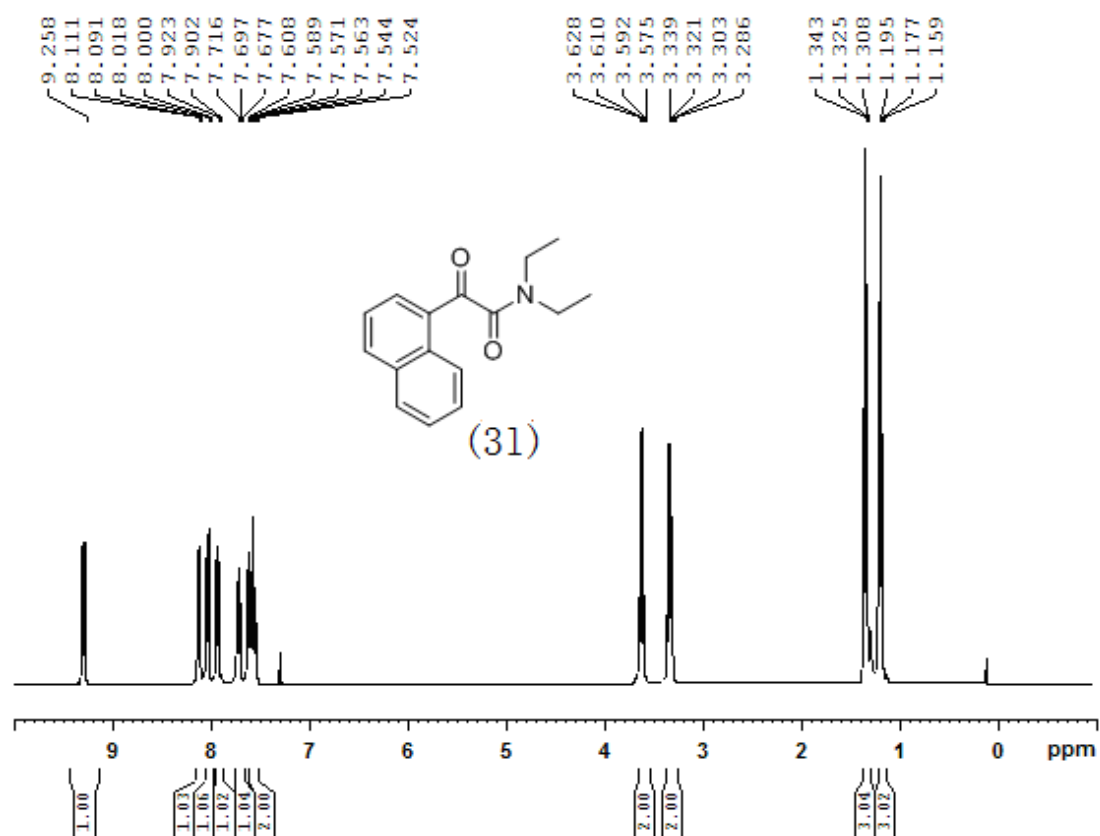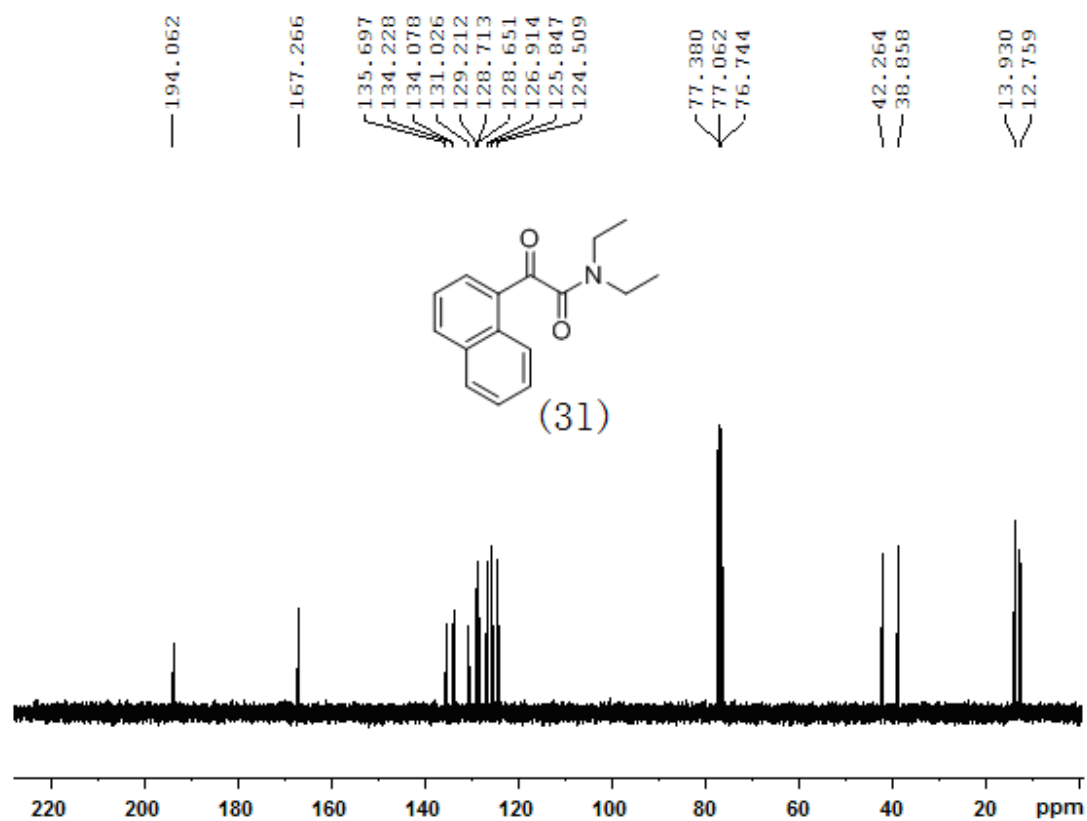

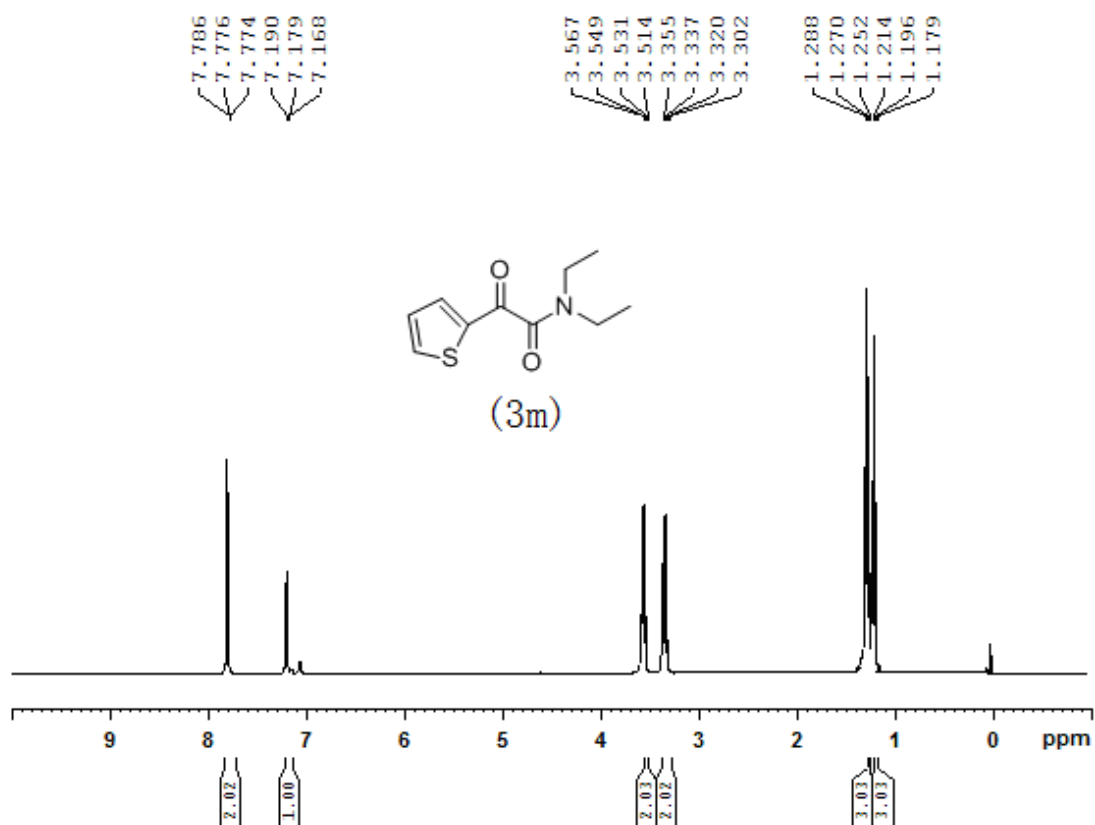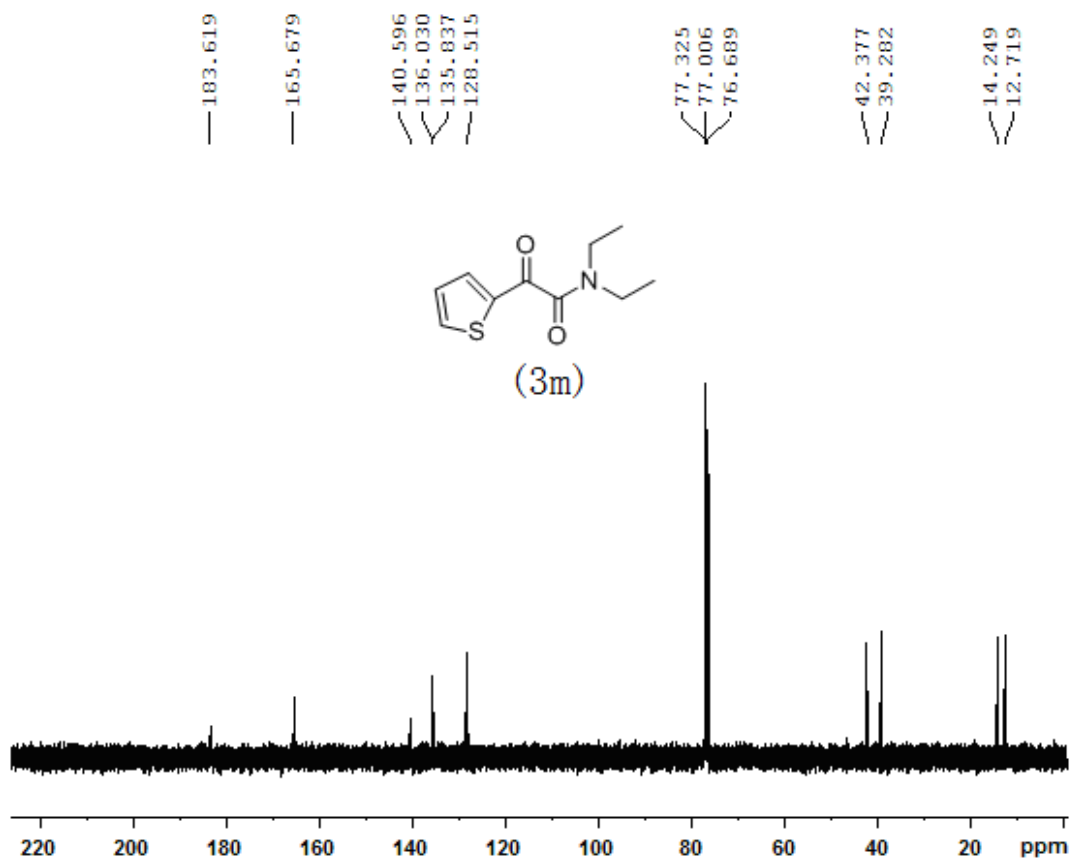

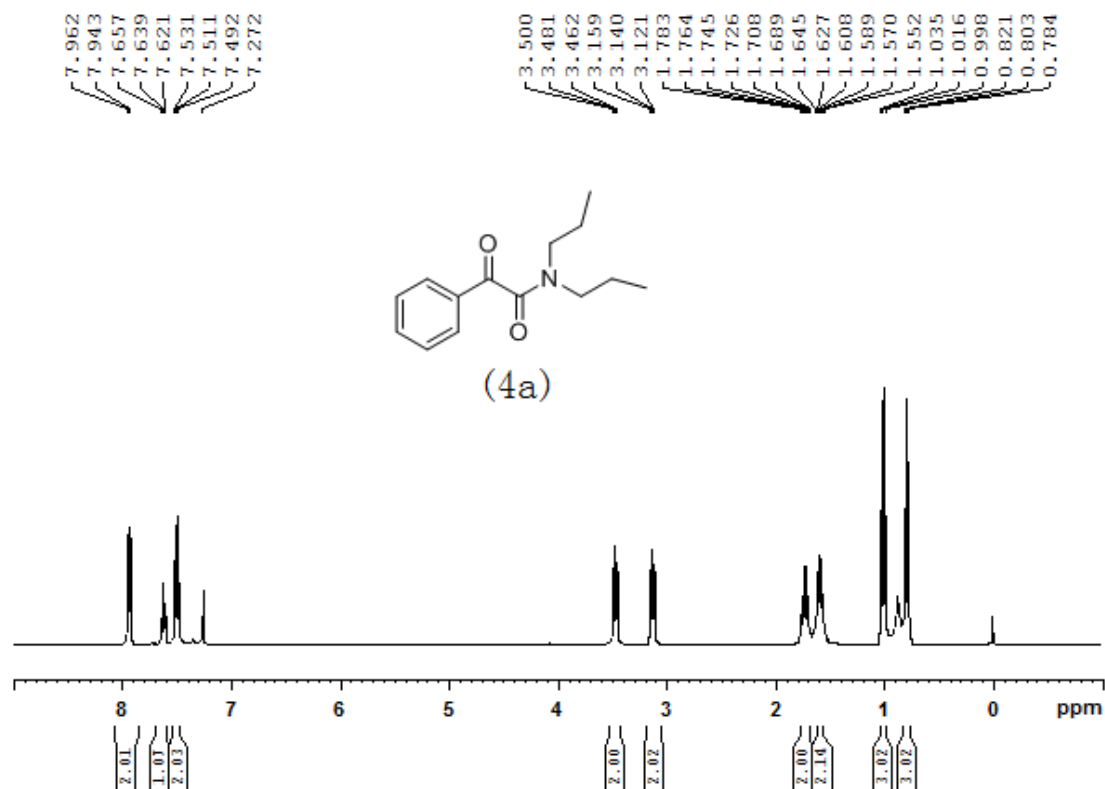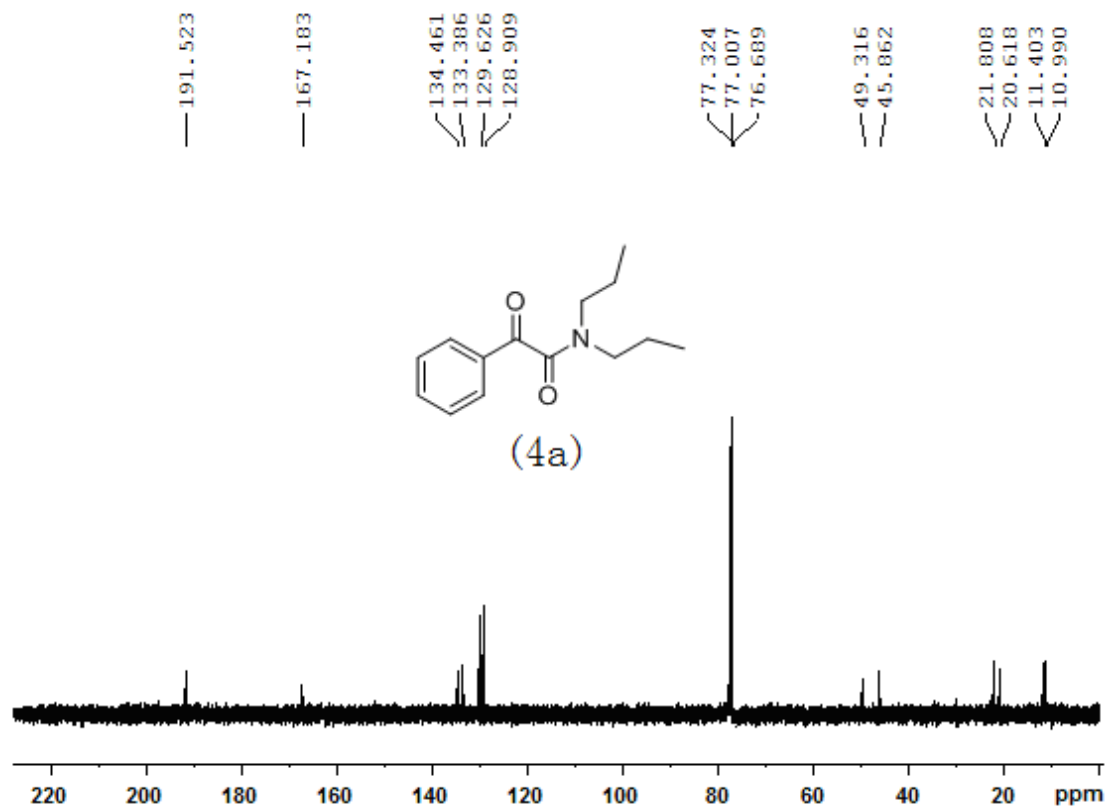

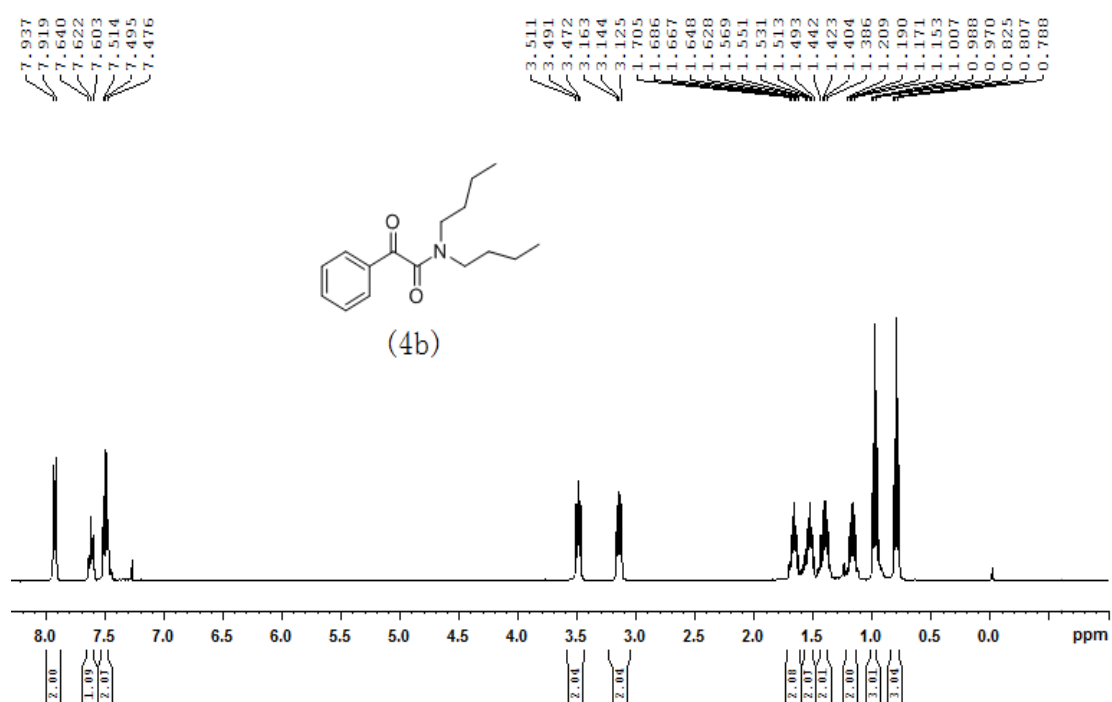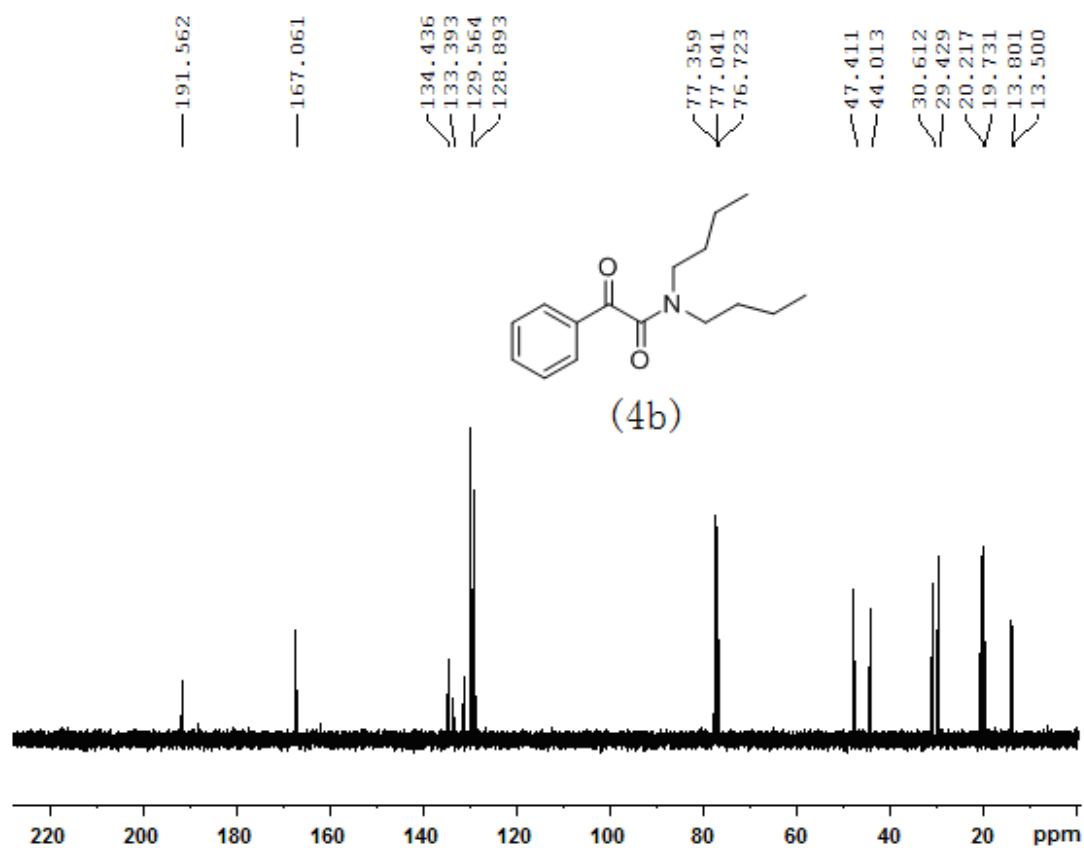



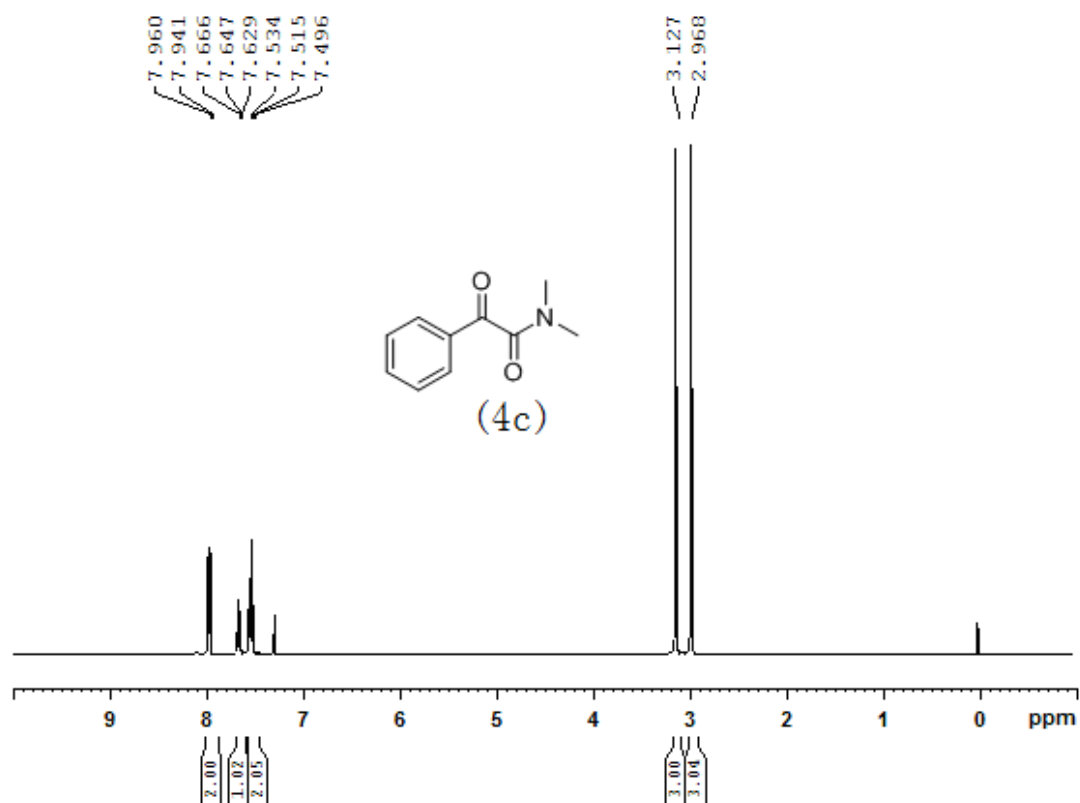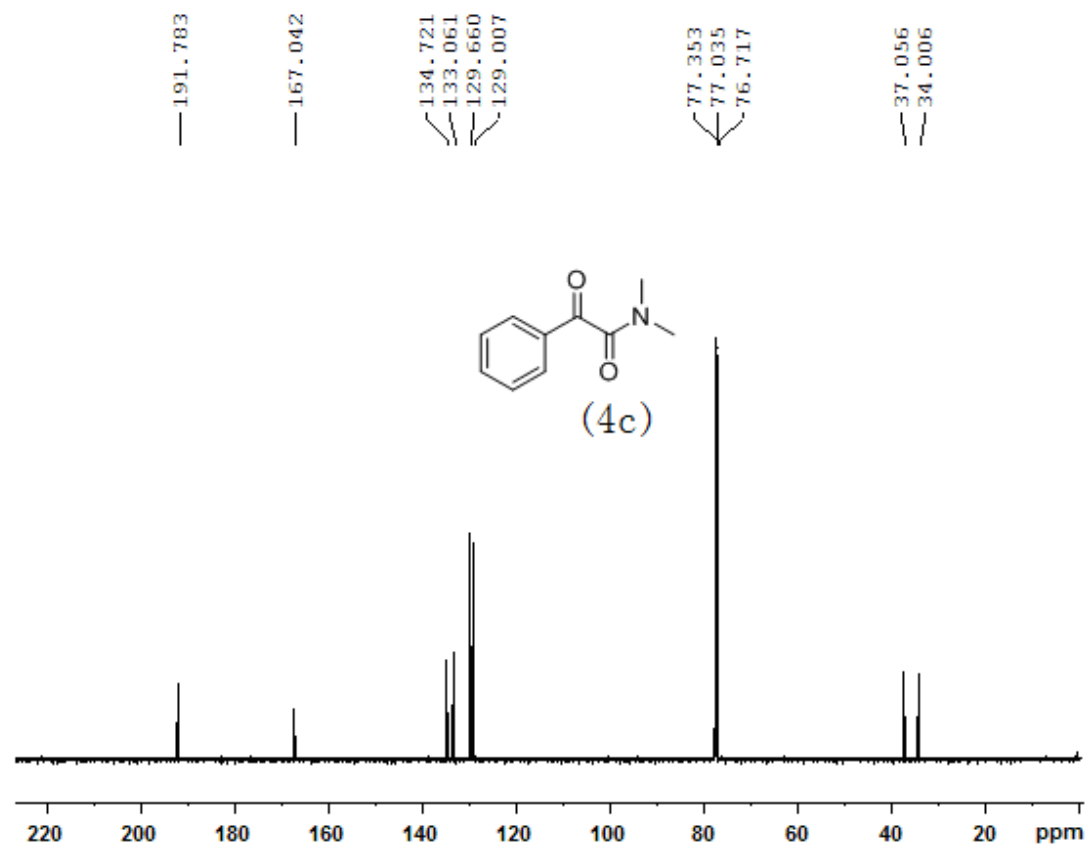

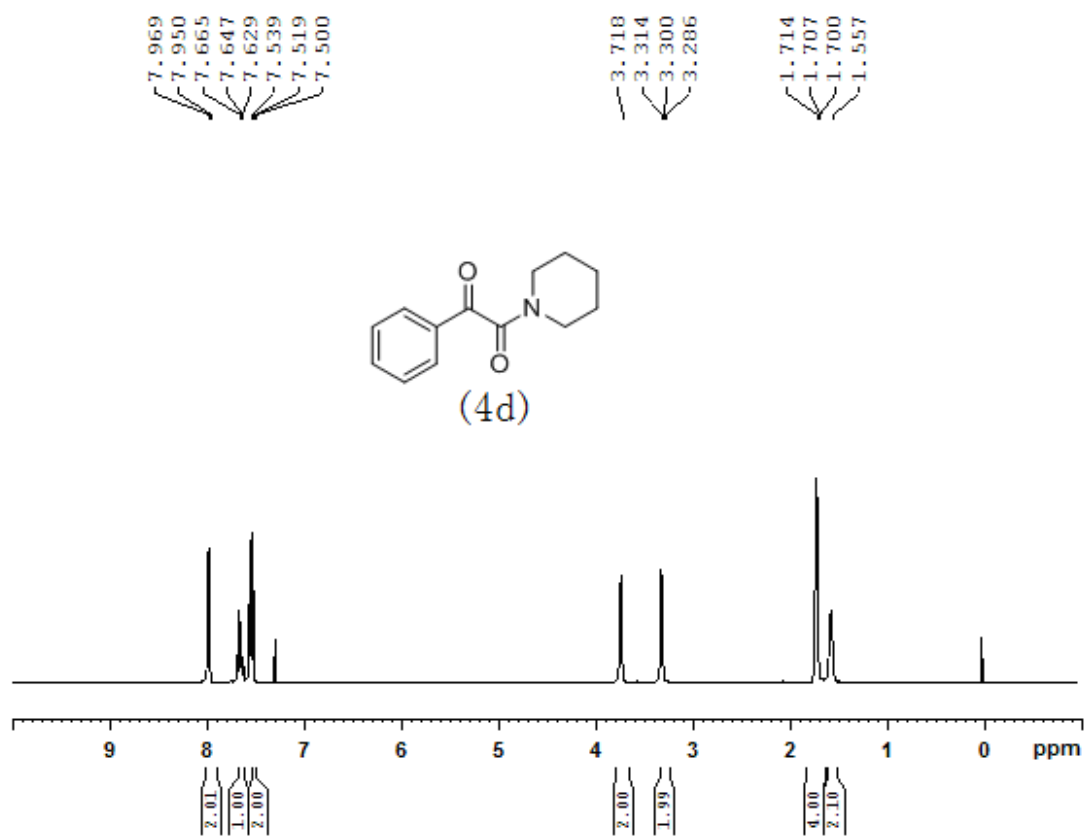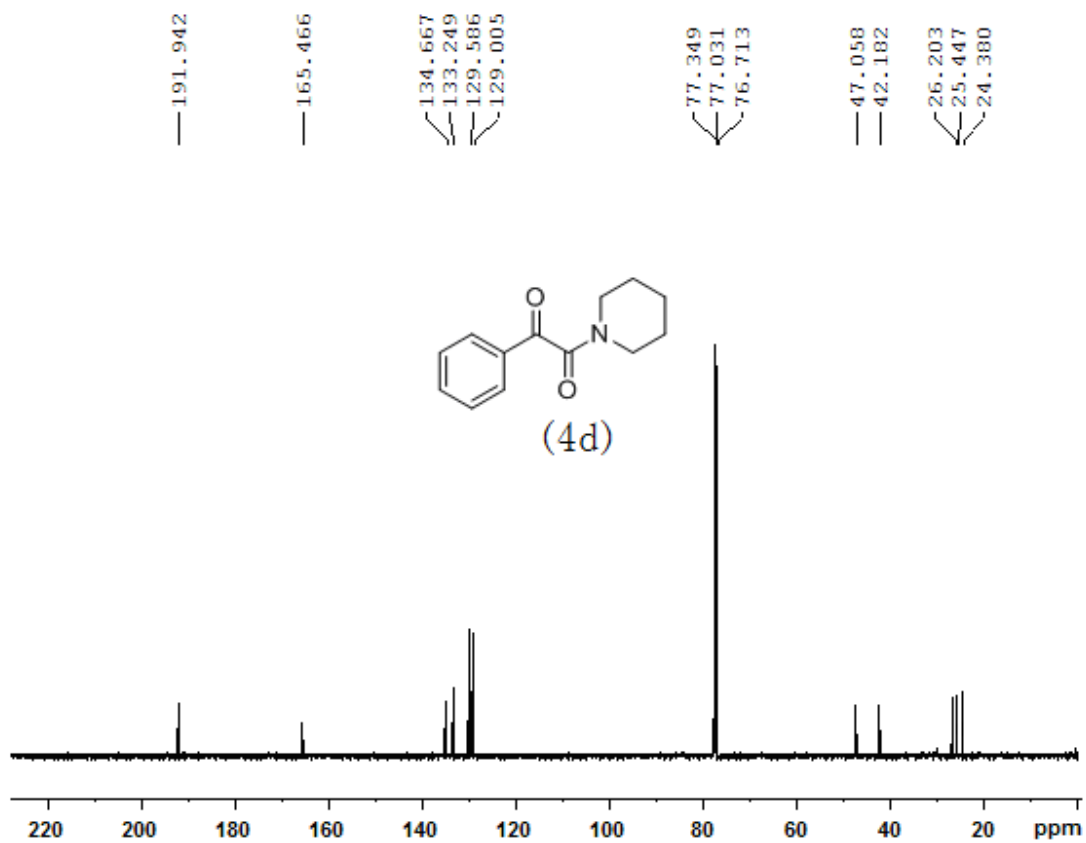

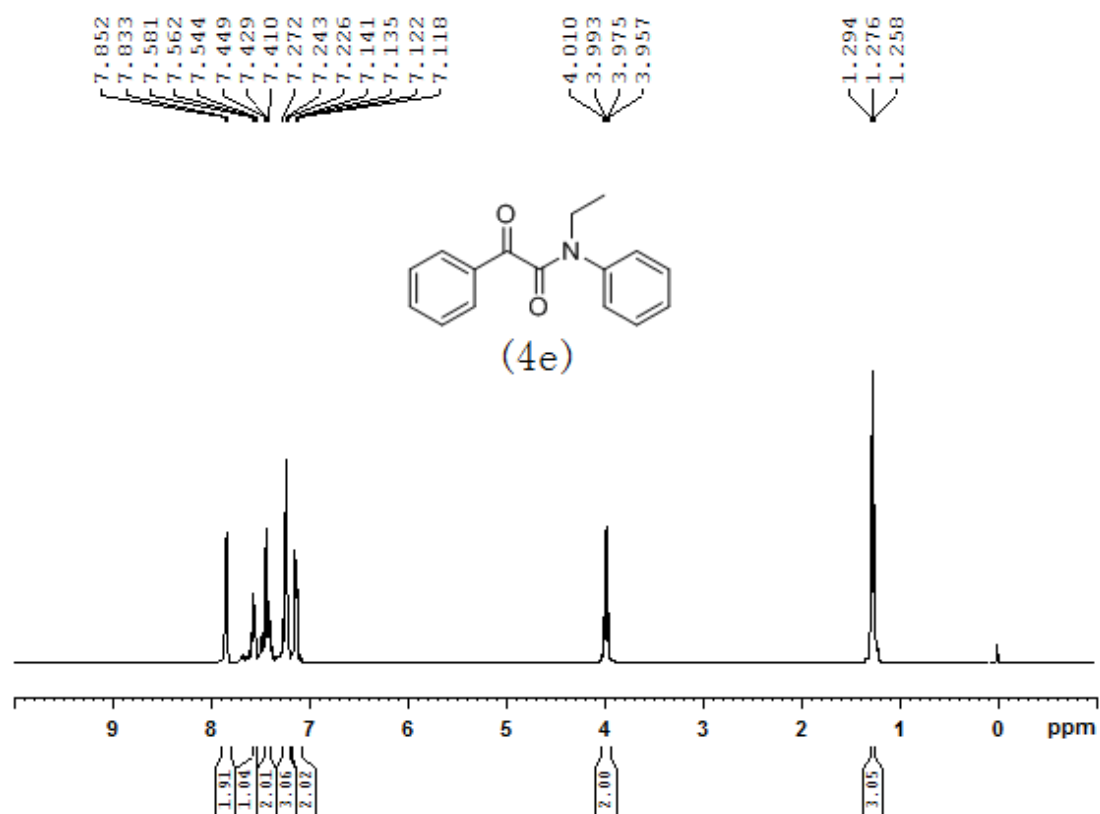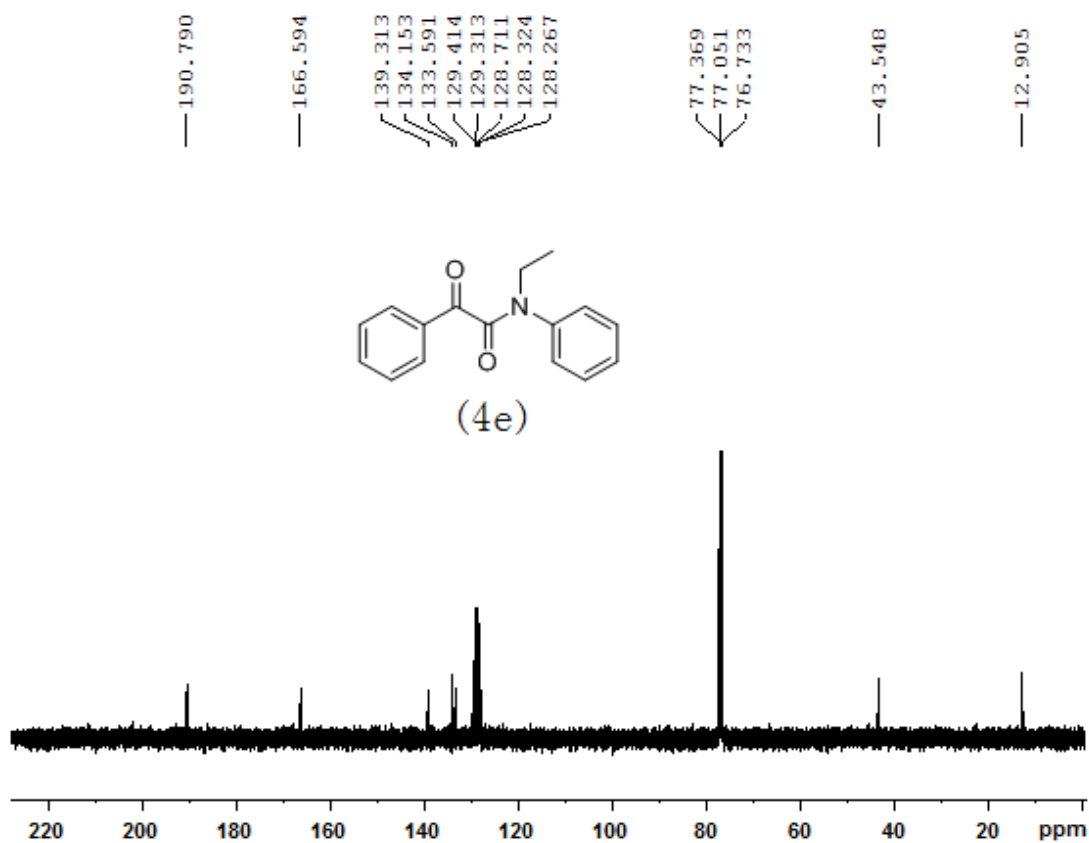

Supplement: c3ob40619a.pdf [file c3ob40619a.pdf]
